# Supplementary material
Source: PubMed Central journal article supplement (PMC4766996)
Supplement: 10.1194_M065847_jlr.M065847-1.pdf [file 10.1194_M065847_jlr.M065847-1.pdf]

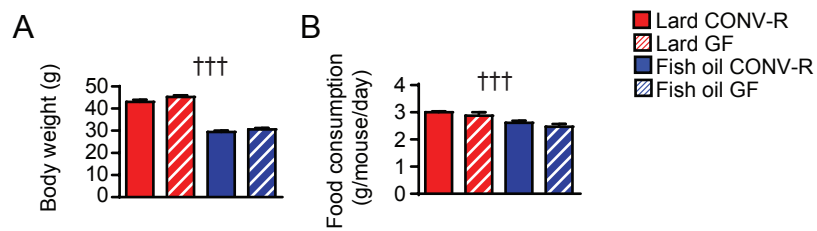

**Supplementary Figure 1. Body weight and diet consumption of CONV-R and GF mice fed lard or fish oil for 11 weeks.** (A) Body weight after 11 weeks of high-fat diet. (B) Food consumption averaged during the first 6 weeks of high-fat diet (n=2-6 cages). Mean values  $\pm$  SEM are plotted. Variation induced by the diet:  $^{\dagger\dagger\dagger}p < 0.001$ .
