# Supplementary material
Source: PubMed Central journal article supplement (PMC4766996)
Supplement: 10.1194_M065847_jlr.M065847-2.pdf [file 10.1194_M065847_jlr.M065847-2.pdf]

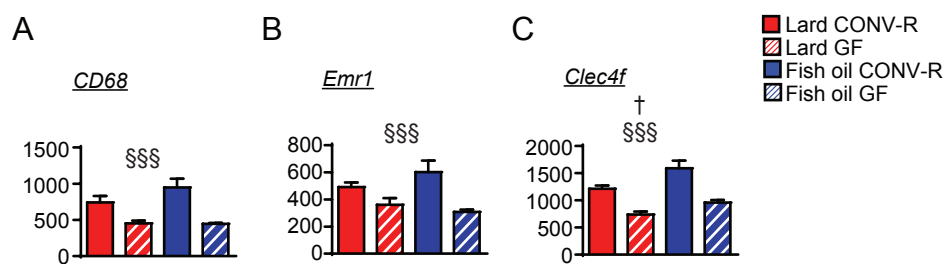

**Supplementary Figure 2. Expression of hepatic genes encoding macrophage markers in CONV-R and GF mice fed lard or fish oil for 11 weeks.** Expression of (A) *CD68*, (B) *Emr1* (encoding F4/80) and (C) *Clec4f* (n=6 mice per group). Mean values  $\pm$  SEM are plotted. Variation induced by the diet: †p < 0.05, Variation induced by the gut microbiota: \$\$\$p < 0.001.
