# Supplementary material
Source: PubMed Central journal article supplement (PMC4766996)
Supplement: 10.1194_M065847_jlr.M065847-3.pdf [file 10.1194_M065847_jlr.M065847-3.pdf]

Supplementary Table I. Fatty acid composition of diets.

| Fatty acid | Lard (10011202) (g) | Fish oil (D05122102) (g) |
|------------|---------------------|--------------------------|
| C10        | 0.1                 | 0                        |
| C12        | 0.2                 | 0                        |
| C14        | 2.0                 | 12.2                     |
| C15        | 0.1                 | 0.8                      |
| C16        | 36.9                | 28.9                     |
| C16:1      | 2.4                 | 17.3                     |
| C16:2      | 0                   | 2.9                      |
| C16:3      | 0                   | 2.7                      |
| C16:4      | 0                   | 2.7                      |
| C17        | 0.7                 | 0.7                      |
| C18        | 19.8                | 5.6                      |
| C18:1      | 64.4                | 23.1                     |
| C18:2      | 56.7                | 16.7                     |
| C18:3      | 4.3                 | 4.6                      |
| C18:4      | 0                   | 5.5                      |
| C20        | 0.3                 | 0.4                      |
| C20:1      | 1.1                 | 2.7                      |
| C20:2      | 1.4                 | 0.4                      |
| C20:3      | 0.2                 | 0.7                      |
| C20:4      | 0.5                 | 3.7                      |
| C20:5      | 0                   | 25.2                     |
| C21:5      | 0                   | 1.3                      |

|                     |       |       |
|---------------------|-------|-------|
| C22                 | 0     | 0.2   |
| C22:1               | 0     | 0.5   |
| C22:4               | 0     | 0.4   |
| C22:5               | 0.2   | 5.0   |
| C22:6               | 0     | 18.2  |
| C24                 | 0     | 1.1   |
| C24:1               | 0     | 0.4   |
|                     |       |       |
| Total               | 191.3 | 183.7 |
|                     |       |       |
| Saturated (%)       | 31.4  | 27.1  |
| Monounsaturated (%) | 35.5  | 23.9  |
| Polyunsaturated (%) | 33.1  | 48.3  |
| Total omega-3 (%)   | 2.3   | 31.8  |
