# Supplementary material
Source: PubMed Central journal article supplement (PMC4766996)
Supplement: 10.1194_M065847_jlr.M065847-4.pdf [file 10.1194_M065847_jlr.M065847-4.pdf]

**Supplementary Table II. Lipids in the liver regulated by the gut microbiota.** ChoE=cholesteryl ester, DG= diglyceride, LysoPC=Lysophosphatidylcholine, PC=phosphatidylcholines, PE= phosphatidylethanolamine, TG=triglyceride, Cer=ceramide and SM=sphingomyelin.

| Name                                                           | FDR (p-value) | Fold change |
|----------------------------------------------------------------|---------------|-------------|
| <i>Lipids increased by the gut microbiota during lard diet</i> |               |             |
| ChoE(16:0)                                                     | 7.7E-03       | 2.64        |
| ChoE(16:1)                                                     | 1.0E-02       | 2.00        |
| ChoE(18:1)                                                     | 7.6E-03       | 1.57        |
| ChoE(18:2)                                                     | 2.7E-03       | 4.00        |
| DG(46:8)                                                       | 6.4E-03       | 1.61        |
| LysoPC(20:0)                                                   | 7.7E-04       | 2.43        |
| PC(34:3)                                                       | 8.1E-03       | 1.43        |
| PC(38:2)                                                       | 1.4E-03       | 1.89        |
| PC(40:1)                                                       | 2.4E-03       | 1.59        |
| PC(40:3)                                                       | 1.8E-03       | 2.40        |
| PC(40:4)                                                       | 5.4E-04       | 2.12        |
| PC(42:2)                                                       | 2.6E-03       | 1.62        |
| PC(42:4)                                                       | 2.4E-03       | 2.08        |
| PC(42:5)                                                       | 4.0E-03       | 1.85        |
| PC(42:6)                                                       | 4.4E-03       | 2.80        |
| PC(42:9)                                                       | 8.9E-03       | 1.71        |
| PC(44:6)                                                       | 7.8E-03       | 2.83        |
| PC(44:7)                                                       | 4.1E-03       | 2.50        |
| PE(34:3)                                                       | 1.0E-02       | 1.38        |
| PE(36:2)                                                       | 1.7E-03       | 1.77        |
| PE(36:3)                                                       | 8.7E-03       | 1.36        |
| PE(38:2)                                                       | 7.5E-03       | 3.16        |

|                                                                           |         |       |
|---------------------------------------------------------------------------|---------|-------|
| PE(38:3)                                                                  | 2.7E-03 | 1.66  |
| PE(40:1)                                                                  | 1.1E-02 | 1.39  |
| TG(60:5)                                                                  | 5.5E-04 | 2.45  |
| TG(60:5)                                                                  | 3.5E-03 | 2.92  |
| TG(60:6)                                                                  | 1.1E-02 | 1.68  |
| <b><i>Lipids reduced by the gut microbiota during lard diet</i></b>       |         |       |
| Cer(d18:1/16:0)                                                           | 2.9E-02 | -1.37 |
| Cer(d18:1/18:0)                                                           | 1.6E-02 | -1.55 |
| Cer(d18:1/20:0)                                                           | 1.6E-02 | -1.32 |
| DG(36:4)                                                                  | 1.0E-02 | -2.10 |
| PC(32:0)                                                                  | 2.2E-02 | -1.22 |
| PC(38:5)                                                                  | 2.8E-02 | -1.57 |
| PC(38:7)                                                                  | 7.1E-04 | -1.59 |
| PE(16:0p/18:1)                                                            | 1.0E-02 | -1.45 |
| PE(38:7e)                                                                 | 1.1E-02 | -1.32 |
| SM(d18:1/14:0)                                                            | 1.5E-02 | -1.23 |
| SM(d18:1/16:0)                                                            | 9.4E-03 | -1.21 |
| TG(50:0)                                                                  | 1.6E-02 | -1.74 |
| TG(51:1)                                                                  | 1.1E-02 | -1.59 |
| TG(54:5)                                                                  | 6.4E-03 | -1.46 |
| TG(54:6)                                                                  | 3.1E-02 | -1.37 |
| TG(56:6)                                                                  | 3.0E-02 | -1.48 |
| TG(56:7)                                                                  | 2.3E-02 | -1.70 |
| TG(60:11)                                                                 | 3.1E-02 | -2.16 |
| <b><i>Lipids increased by the gut microbiota during fish-oil diet</i></b> |         |       |
| PC(32:3)                                                                  | 1.7E-02 | 1.22  |
| PC(34:0e)                                                                 | 1.4E-02 | 1.41  |

|                                                                         |         |       |
|-------------------------------------------------------------------------|---------|-------|
| PC(40:1)                                                                | 1.8E-03 | 1.49  |
| PC(40:2)                                                                | 3.7E-03 | 1.59  |
| PC(42:2)                                                                | 5.6E-03 | 1.50  |
| PC(42:4)                                                                | 7.5E-03 | 1.39  |
| PC(42:5)                                                                | 8.5E-03 | 1.38  |
| PC(42:6)                                                                | 5.5E-03 | 1.24  |
| PC(44:6)                                                                | 1.1E-03 | 1.75  |
| PC(44:7)                                                                | 4.8E-04 | 1.71  |
| PE(38:2)                                                                | 9.7E-03 | 1.45  |
| PE(40:4)                                                                | 1.2E-03 | 1.23  |
| PE(40:6e)                                                               | 2.2E-02 | 1.35  |
| PE(40:7e)                                                               | 3.0E-03 | 1.30  |
| <b><i>Lipids reduced by the gut microbiota during fish-oil diet</i></b> |         |       |
| Cer(d18:1/18:0)                                                         | 1.6E-03 | -1.32 |
| Cer(d18:1/19:0)                                                         | 2.2E-05 | -1.40 |
| Cer(d18:1/20:0)                                                         | 7.5E-06 | -1.71 |
| Cer(d18:1/22:1)                                                         | 1.1E-03 | -1.44 |
| Cer(d18:1/23:1)                                                         | 8.0E-04 | -1.63 |
| Cer(d18:1/24:1)                                                         | 8.5E-04 | -1.37 |
| Cer(d18:2/24:1)                                                         | 9.3E-06 | -1.56 |
| DG(36:4)                                                                | 4.6E-05 | -1.71 |
| DG(38:4)                                                                | 1.2E-03 | -1.46 |
| DG(40:6)                                                                | 3.3E-03 | -1.51 |
| DG(40:6)                                                                | 7.0E-03 | -1.42 |
| LysoPC(18:0)                                                            | 3.6E-03 | -1.30 |
| PC(38:3)                                                                | 2.7E-04 | -1.39 |
| PE(36:0)                                                                | 5.5E-03 | -1.21 |

|                |         |       |
|----------------|---------|-------|
| SM(d17:1/22:0) | 1.5E-03 | -1.38 |
| SM(d18:1/14:0) | 4.3E-05 | -1.45 |
| SM(d18:1/20:0) | 2.7E-03 | -1.36 |
| TG(48:1)       | 7.0E-03 | -1.51 |
| TG(49:1)       | 2.2E-03 | -1.94 |
| TG(49:2)       | 1.8E-03 | -1.90 |
| TG(50:4)       | 4.3E-03 | -1.66 |
| TG(51:1)       | 1.7E-03 | -2.09 |
| TG(51:2)       | 2.6E-03 | -2.37 |
| TG(51:3)       | 2.3E-03 | -2.28 |
| TG(51:4)       | 4.4E-03 | -1.61 |
| TG(52:5)       | 3.4E-03 | -1.69 |
| TG(53:4)       | 3.3E-03 | -1.73 |
| TG(54:5)       | 7.4E-04 | -1.74 |
| TG(54:5)       | 3.7E-03 | -1.52 |
| TG(54:6)       | 2.3E-03 | -2.26 |
| TG(54:7)       | 1.6E-03 | -2.00 |
| TG(56:5)       | 7.7E-04 | -3.31 |
| TG(56:6)       | 1.1E-03 | -1.94 |
| TG(56:7)       | 8.2E-04 | -1.84 |
| TG(56:7)       | 2.7E-03 | -1.66 |
| TG(56:8)       | 4.4E-03 | -1.59 |
| TG(56:9)       | 6.5E-03 | -1.64 |
| TG(57:6)       | 4.5E-04 | -1.65 |
| TG(57:9)       | 2.9E-03 | -1.73 |
| TG(58:10)      | 3.8E-03 | -1.95 |
| TG(58:11)      | 6.8E-03 | -1.68 |

|           |         |       |
|-----------|---------|-------|
| TG(58:8)  | 2.1E-03 | -1.58 |
| TG(58:9)  | 3.5E-03 | -1.42 |
| TG(60:11) | 1.7E-03 | -1.96 |
