# Supplementary material
Source: PubMed Central journal article supplement (PMC4766996)
Supplement: 10.1194_M065847_jlr.M065847-5.pdf [file 10.1194_M065847_jlr.M065847-5.pdf]

**Supplementary Table III. Lipids in serum regulated by the gut microbiota.** ChoE=cholesteryl ester, DG= diglyceride, LysoPC=Lysophosphatidylcholine, PC=phosphatidylcholines, PE= phosphatidylethanolamine, TG=triglyceride, Cer=ceramide and SM=sphingomyelin.

| <b>Name</b>                                                    | <b>FDR (p-value)</b> | <b>Fold change</b> |
|----------------------------------------------------------------|----------------------|--------------------|
| <i>Lipids increased by the gut microbiota during lard diet</i> |                      |                    |
| Cer(d18:1/22:6)                                                | 9.9E-03              | 1.20               |
| LysoPC(20:0)                                                   | 5.8E-06              | 2.52               |
| LysoPC(22:3)                                                   | 2.0E-05              | 2.71               |
| LysoPE(22:0)                                                   | 2.1E-03              | 1.23               |
| PC(36:2e)                                                      | 2.0E-02              | 1.19               |
| PC(36:5)                                                       | 2.3E-02              | 1.41               |
| PC(38:1)                                                       | 1.4E-02              | 1.40               |
| PC(38:2)                                                       | 2.8E-05              | 1.85               |
| PC(40:2)                                                       | 4.0E-04              | 1.77               |
| PC(40:3)                                                       | 1.1E-03              | 2.18               |
| PC(40:4)                                                       | 1.1E-04              | 1.67               |
| PC(42:4)                                                       | 1.3E-03              | 1.63               |
| PC(42:5)                                                       | 1.3E-03              | 1.75               |
| PC(42:6)                                                       | 6.1E-05              | 2.87               |
| PC(42:6e)                                                      | 3.5E-04              | 1.37               |
| PC(42:9)                                                       | 2.9E-02              | 1.19               |
| PC(44:6)                                                       | 1.5E-03              | 2.60               |
| PE(40:2)                                                       | 4.3E-03              | 1.21               |
| PE(40:4e)                                                      | 2.9E-02              | 1.15               |
| PE(44:6)                                                       | 4.6E-03              | 1.62               |
| SM(d18:1/21:0)                                                 | 4.3E-02              | 1.54               |
| TG(46:6)                                                       | 8.9E-03              | 1.34               |
| TG(58:3)                                                       | 5.0E-02              | 1.82               |
| TG(58:4)                                                       | 1.5E-02              | 2.11               |

|                                                                           |         |       |
|---------------------------------------------------------------------------|---------|-------|
| TG(58:5)                                                                  | 3.9E-02 | 1.54  |
| TG(60:7)                                                                  | 1.5E-03 | 1.92  |
| TG(60:8)                                                                  | 3.5E-02 | 1.43  |
| <b><i>Lipids reduced by the gut microbiota during lard diet</i></b>       |         |       |
| ChoE(20:4)                                                                | 4.3E-02 | -1.23 |
| ChoE(22:5)                                                                | 4.3E-02 | -1.58 |
| ChoE(22:6)                                                                | 4.8E-02 | -1.45 |
| PC(32:1)                                                                  | 4.3E-02 | -1.39 |
| PC(32:1e)                                                                 | 4.1E-02 | -1.08 |
| PC(34:4)                                                                  | 2.9E-02 | -1.56 |
| PC(36:4)                                                                  | 2.9E-02 | -1.12 |
| PC(36:4e)                                                                 | 3.4E-02 | -1.24 |
| PC(36:5e)                                                                 | 2.9E-02 | -1.62 |
| PC(38:4)                                                                  | 1.6E-02 | -1.26 |
| PC(38:5)                                                                  | 3.6E-02 | -1.21 |
| PC(38:7)                                                                  | 3.5E-02 | -1.63 |
| PE(38:1e)                                                                 | 2.8E-02 | -1.29 |
| PE(38:4)                                                                  | 4.1E-02 | -1.31 |
| PE(38:7e)                                                                 | 3.5E-02 | -1.26 |
| PE(40:4)                                                                  | 4.5E-03 | -1.56 |
| PE(40:5)                                                                  | 4.7E-02 | -1.31 |
| SM(d18:1/14:0)                                                            | 1.4E-02 | -1.34 |
| SM(d18:1/15:0)                                                            | 3.3E-04 | -1.35 |
| SM(d18:1/16:0)                                                            | 2.1E-02 | -1.14 |
| SM(d18:1/18:0)                                                            | 9.0E-03 | -1.46 |
| SM(d18:1/20:0)                                                            | 4.0E-02 | -1.24 |
| SM(d18:1/23:0)                                                            | 2.2E-02 | -1.19 |
| TG(54:5)                                                                  | 4.3E-02 | -1.72 |
| <b><i>Lipids increased by the gut microbiota during fish-oil diet</i></b> |         |       |
| PC(42:6e)                                                                 | 1.1E-05 | 1.91  |

|                                                                  |         |       |
|------------------------------------------------------------------|---------|-------|
| PC(42:7e)                                                        | 1.7E-03 | 2.19  |
| PC(44:6)                                                         | 6.9E-03 | 1.95  |
| <i>Lipids reduced by the gut microbiota during fish-oil diet</i> |         |       |
| SM(d18:1/14:0)                                                   | 1.6E-03 | -1.60 |
| SM(d18:1/15:0)                                                   | 9.7E-03 | -1.36 |
| SM(d18:1/16:0)                                                   | 2.3E-02 | -1.19 |
| SM(d18:1/20:0)                                                   | 9.6E-03 | -1.52 |
